# Supplementary material
Source: HighWire-hosted journal article supplement (http://jmg.bmjjournals.com/highwire/filestream/160639/field_highwire_adjunct_files/2/Supplemental_Figure_2.pdf)

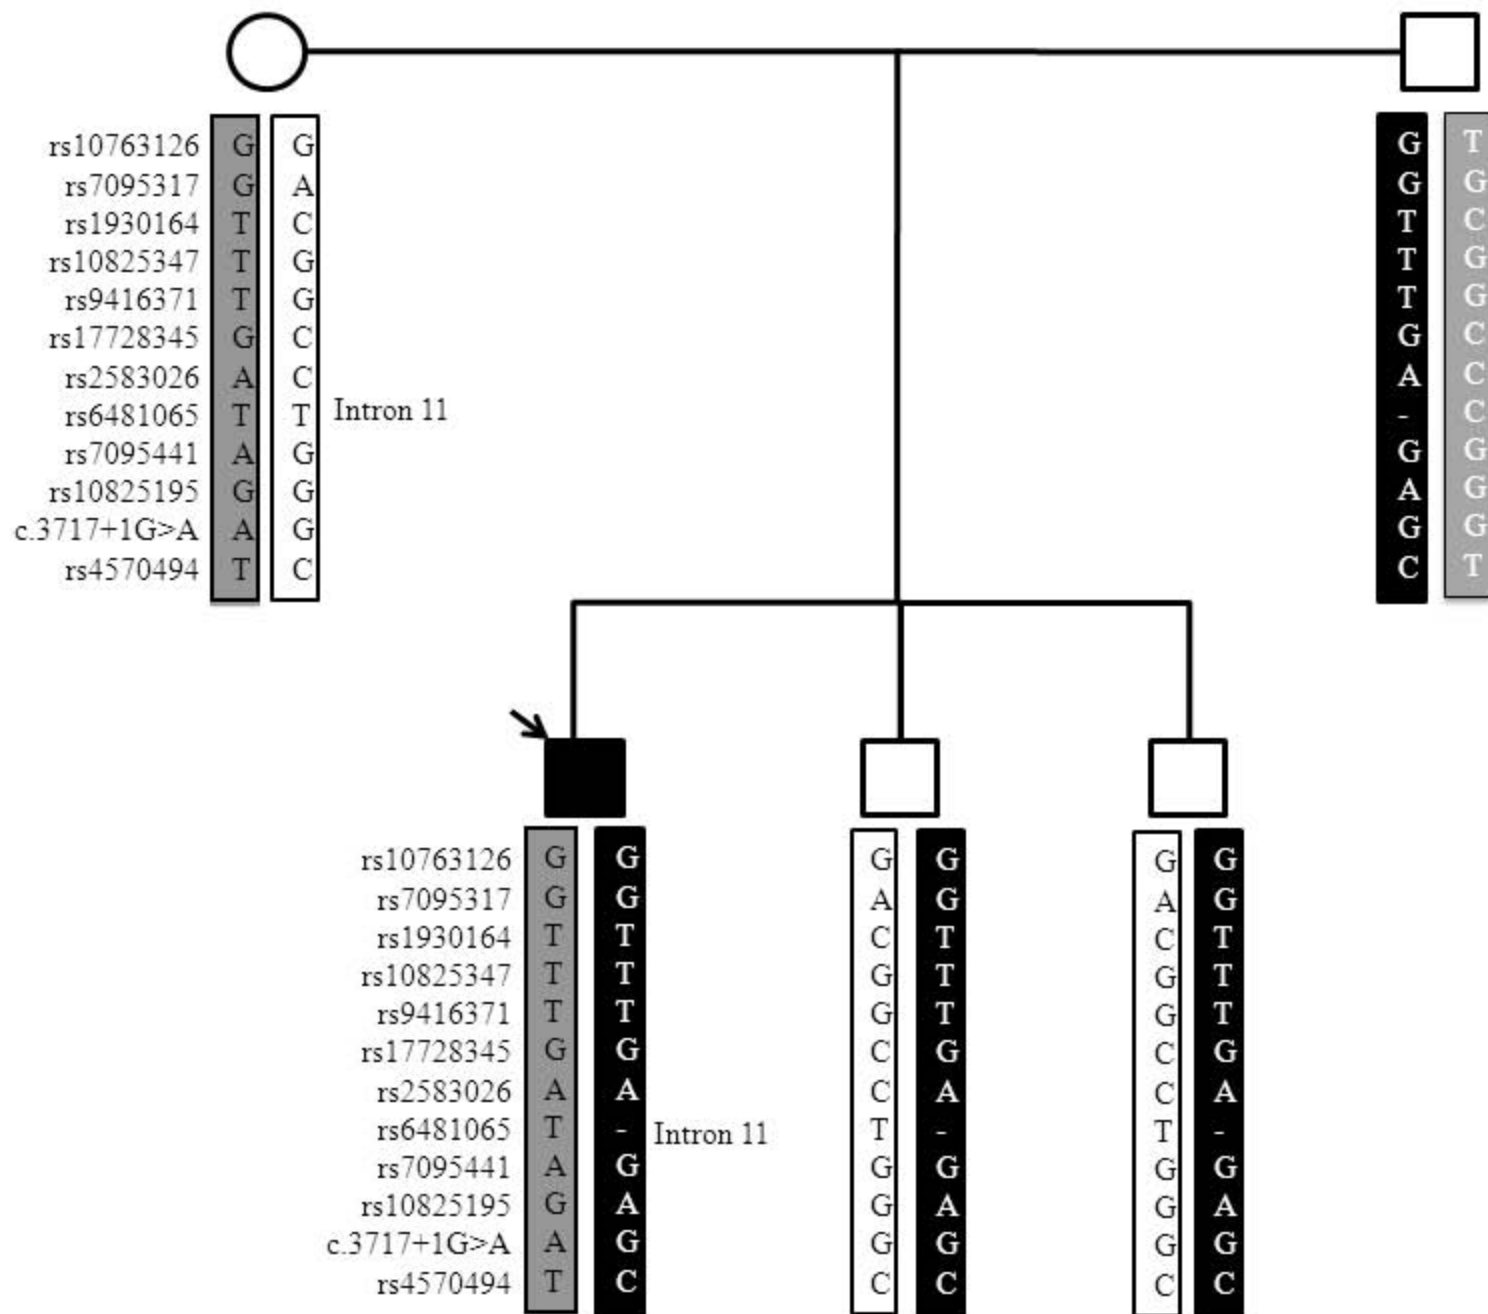

Supplement: Supplemental_Figure_2.pdf [file Supplemental_Figure_2.pdf]
